# Supplementary figures and images for: Using a Syrian (Golden) Hamster Biological Model for the Evaluation of Recombinant Anthrax Vaccines
Source: MDPI journal article supplement (doi:10.3390/life11121388), 2021-12-11

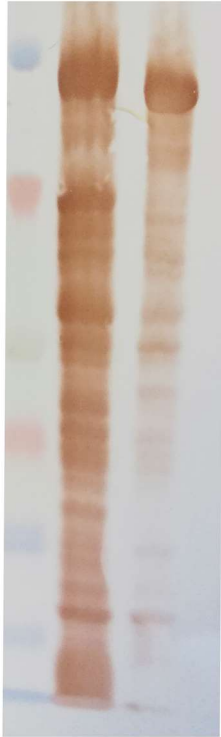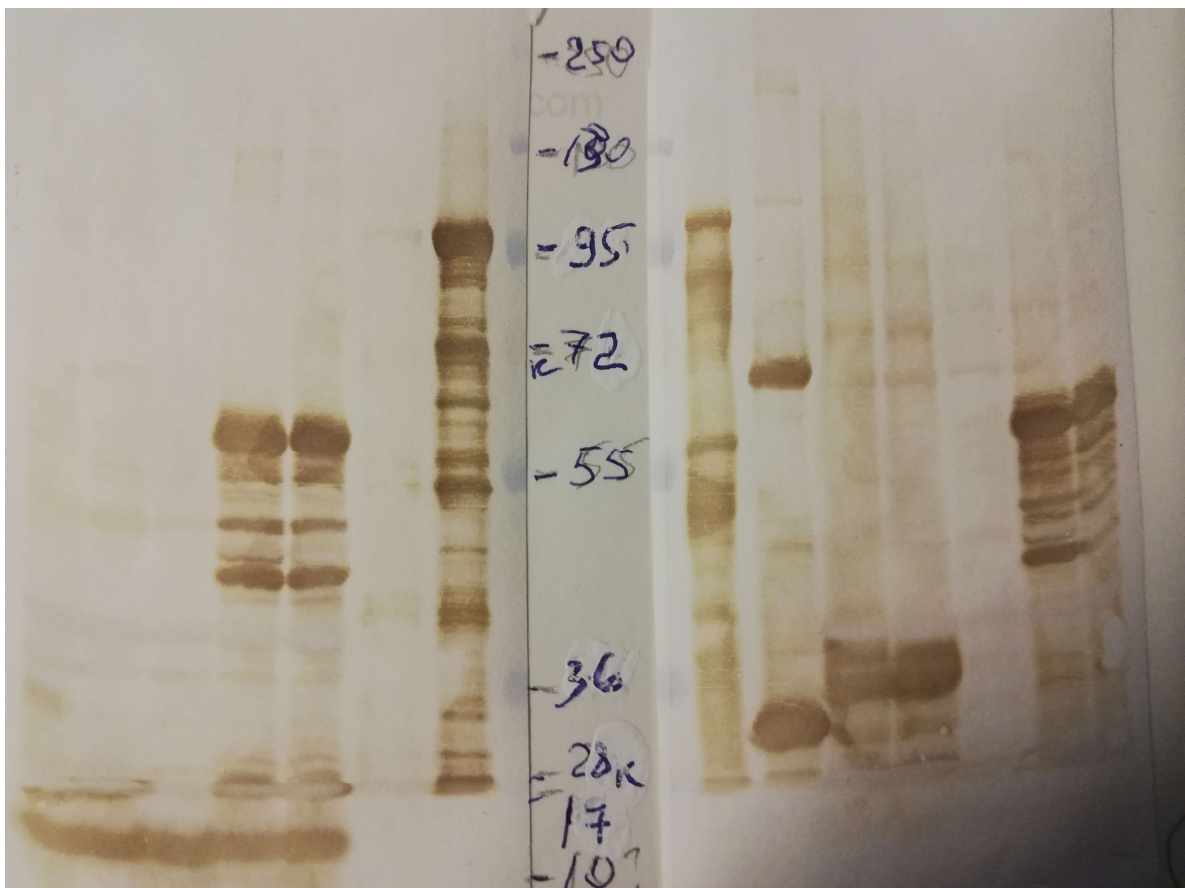

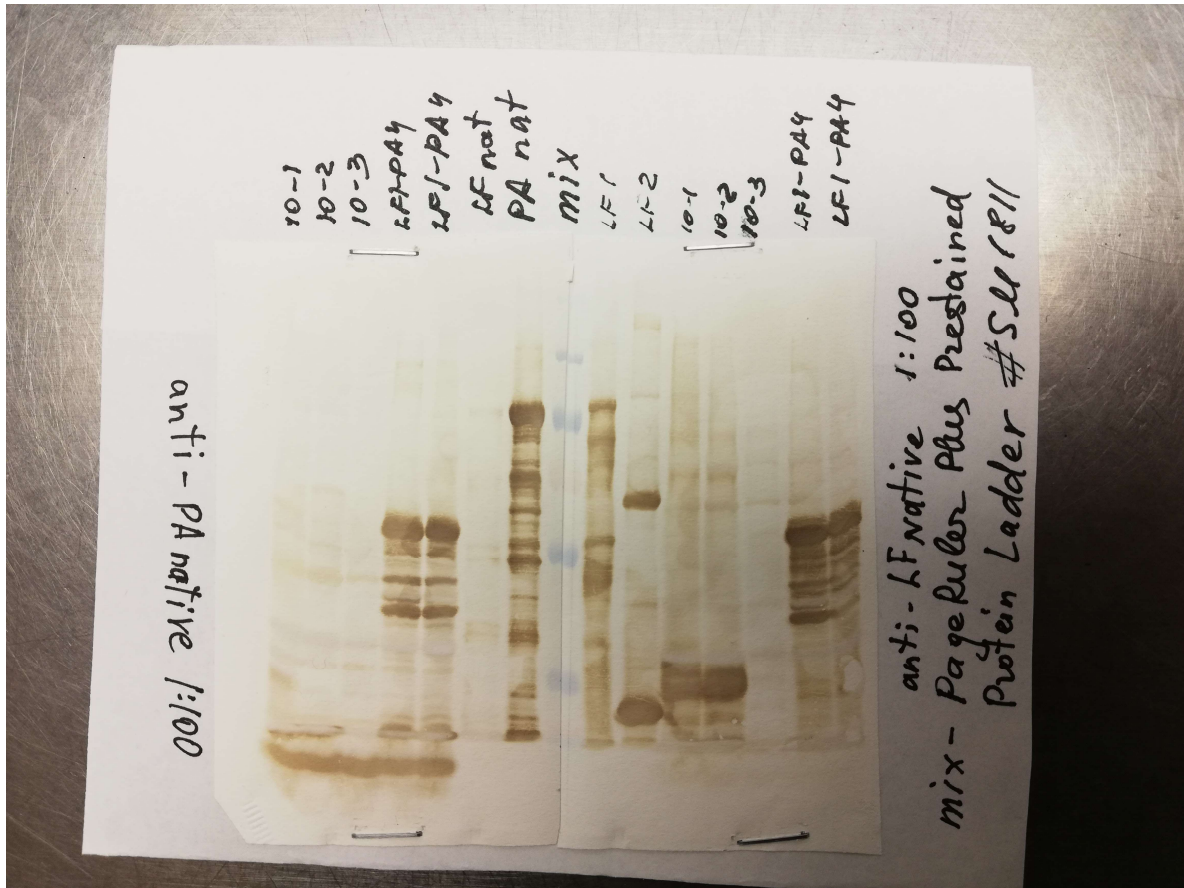

Figure S1. Original western blot figures of figure 1

Supplement: s1 [file s1]
